# Supplementary material for: Inferring speciation modes in a clade of Iberian chafers from rates of morphological evolution in different character systems
Source: PubMed Central journal article supplement (PMC2753572; doi:10.1186/1471-2148-9-234), 2009-09-15
Supplement: 1471-2148-9-234-S1.pdf [file 1471-2148-9-234-S1.pdf]

**Additional file 1.** Genbank accession numbers and collection data of the specimens used in the study.

| Species                      | Voucher number                                                                   | Locality                                                                                    | Coordinates                   | Date      | Accession no.                                                 |                                                                 |                               |           |          |
|------------------------------|----------------------------------------------------------------------------------|---------------------------------------------------------------------------------------------|-------------------------------|-----------|---------------------------------------------------------------|-----------------------------------------------------------------|-------------------------------|-----------|----------|
|                              |                                                                                  |                                                                                             |                               |           | <i>cox1</i>                                                   | <i>rrnL</i>                                                     |                               |           |          |
| <i>Hymenoplia arragonica</i> | DA0153                                                                           | Spain: Andalusia, Arroyo de las Grajas (Sierra de Segura), E Embalse del Tranco, 709m       | 38°03'10.9"N,<br>02°48'48.9"W | 24.v.2006 | FJ847234                                                      | FJ956708                                                        |                               |           |          |
|                              | DA0154                                                                           |                                                                                             |                               |           | FJ847235                                                      | FJ956709                                                        |                               |           |          |
|                              | DA0158                                                                           |                                                                                             |                               |           | FJ847236                                                      | FJ956710                                                        |                               |           |          |
|                              | DA0159                                                                           |                                                                                             |                               |           | FJ847237                                                      | FJ956711                                                        |                               |           |          |
| <i>H. clypealis</i>          | DA0163                                                                           | Spain: Castilla la Mancha, Puerto de Niefla (Sierra del Rey), ca 40 km SW Puertollano, 902m | 38°32'08.9"N,<br>04°23'07.7"W | 22.v.2006 | FJ847238                                                      | -                                                               |                               |           |          |
|                              | DA0164                                                                           |                                                                                             |                               |           | FJ847239                                                      | FJ956712                                                        |                               |           |          |
|                              | DA0200                                                                           |                                                                                             |                               |           | FJ847240                                                      | FJ956713                                                        |                               |           |          |
| <i>H. escalerae</i>          | DA0201                                                                           | Spain: Alicante, Puerto de Biar, Biar                                                       | -                             | 13.v.2006 | FJ847241                                                      | FJ956714                                                        |                               |           |          |
|                              | DA0017                                                                           |                                                                                             |                               |           | FJ847242                                                      | FJ956715                                                        |                               |           |          |
|                              | DA0018                                                                           |                                                                                             |                               |           | FJ847243                                                      | FJ956716                                                        |                               |           |          |
|                              | DA0019                                                                           |                                                                                             |                               |           | FJ847244                                                      | FJ956717                                                        |                               |           |          |
| <i>H. fulvipennis</i>        | DA0021                                                                           | Spain: Valencia, Balsa en cuneta, Enguera                                                   | -                             | 6.v.2006  | FJ847244                                                      | FJ956717                                                        |                               |           |          |
|                              | DA0021                                                                           | Spain: Valencia, Barranco Río Grande, Quesa                                                 | -                             | 6.v.2006  | FJ847245                                                      | FJ956718                                                        |                               |           |          |
|                              | DA0115                                                                           | Spain: Andalusia, Hinojos 14.5km E of Almonte, 117m,                                        | 37°17'21.1"N,<br>06°22'26.9"W | 16.v.2006 | FJ847246                                                      | FJ956719                                                        |                               |           |          |
|                              | DA0116                                                                           |                                                                                             |                               |           | FJ847247                                                      | FJ956720                                                        |                               |           |          |
|                              | DA0117                                                                           | Spain: Andalusia, Camping Torre de la Higuera, Dunes (47km SE Huelva), 47m                  | 37°00'50.3"N,<br>06°34'38.9"W | 16.v.2006 | FJ847248                                                      | FJ956721                                                        |                               |           |          |
| DA0198                       | FJ847249                                                                         |                                                                                             |                               |           | FJ956722                                                      |                                                                 |                               |           |          |
| DA0214                       | Spain: Andalusia, 2 km NE of Faro El Picach de la Barre (ca 20km SE Huelva), 51m |                                                                                             |                               |           | 37°08'45.5"N,<br>06°44'56.4"W                                 | 17.v.2006                                                       | FJ847250                      | FJ956723  |          |
| <i>H. galaica</i>            | DA0215                                                                           | Spain: Extremadura: Badajoz, 2 km E La Bazana, 5 km SE Jerez , 544m                         | 38°14'40.6"N,<br>06°40'58.8"W | 19.v.2006 | FJ847251                                                      | FJ956724                                                        |                               |           |          |
|                              | DA0145                                                                           |                                                                                             |                               |           | FJ847252                                                      | FJ956725                                                        |                               |           |          |
| <i>H. lineolata</i>          | DA0146                                                                           | Spain: Andalusia, Embalse de Retortillo env., 147m                                          | 37°50'09.5"N,<br>05°18'44.7"W | 13.v.2006 | FJ847253                                                      | FJ956726                                                        |                               |           |          |
|                              | DA0090                                                                           |                                                                                             |                               |           | FJ847254                                                      | FJ956727                                                        |                               |           |          |
|                              | DA0091                                                                           |                                                                                             |                               |           | FJ847270                                                      | FJ956743                                                        |                               |           |          |
|                              | DA0092                                                                           |                                                                                             |                               |           | FJ847255                                                      | FJ956728                                                        |                               |           |          |
|                              | DA0093                                                                           |                                                                                             |                               |           | FJ847256                                                      | FJ956729                                                        |                               |           |          |
|                              | DA0094                                                                           |                                                                                             |                               |           | FJ847269                                                      | FJ956742                                                        |                               |           |          |
|                              | DA0095                                                                           |                                                                                             |                               |           | FJ847257                                                      | FJ956730                                                        |                               |           |          |
|                              | DA0096                                                                           |                                                                                             |                               |           | FJ847258                                                      | FJ956731                                                        |                               |           |          |
|                              | BM747067                                                                         |                                                                                             |                               |           | EF487759                                                      | EF487803                                                        |                               |           |          |
|                              | DA0114                                                                           |                                                                                             |                               |           | Spain: Andalusia, Hinojos 14,5km E of Almonte, 117m           | 37°17'21.1"N,<br>06°22'26.9"W                                   | 16.V.2006                     | FJ847259  | FJ956732 |
|                              | DA0119                                                                           |                                                                                             |                               |           | FJ847260                                                      | FJ956733                                                        |                               |           |          |
|                              | DA0186                                                                           |                                                                                             |                               |           | Spain: Andalusia, 3 km W Patrás, S of Sierra de Aracena, 282m | 37°48'35.9"N,<br>06°43'55.5"W                                   | 19.V.2006                     | FJ847261  | FJ956734 |
|                              | <i>H. pseudocinerascens</i>                                                      |                                                                                             |                               |           | DA0187                                                        | Spain: Andalusia, 5 km NW Maria (A317) (Sierra de Maria), 1243m | 37°43'42.2"N,<br>02°13'52.1"W | 25.v.2006 | FJ847262 |
| DA0149                       |                                                                                  | FJ847263                                                                                    | FJ956736                      |           |                                                               |                                                                 |                               |           |          |
| DA0150                       |                                                                                  | FJ847264                                                                                    | FJ956737                      |           |                                                               |                                                                 |                               |           |          |
| <i>H. rugulosa</i>           | DA0151                                                                           | Spain: Extremadura, Camping La Vera (1km E Jarandilla), 647m                                | 40°07'22.4"N,<br>05°38'18.4"W | 21.v.2006 | FJ847265                                                      | FJ956738                                                        |                               |           |          |
|                              | DA0140                                                                           |                                                                                             |                               |           | FJ847266                                                      | FJ956739                                                        |                               |           |          |
|                              | DA0141                                                                           |                                                                                             |                               |           | FJ847267                                                      | FJ956740                                                        |                               |           |          |
|                              | DA0142                                                                           |                                                                                             |                               |           | FJ847268                                                      | FJ956741                                                        |                               |           |          |
| <i>Paratriodonta romana</i>  | BM670857                                                                         | Italy: Lazio, Castel Porziano                                                               | -                             | -         | EF487773                                                      | EF487910                                                        |                               |           |          |
