# Supplementary material for: Inferring speciation modes in a clade of Iberian chafers from rates of morphological evolution in different character systems
Source: PubMed Central journal article supplement (PMC2753572; doi:10.1186/1471-2148-9-234), 2009-09-15
Supplement: 1471-2148-9-234-S2.pdf [file 1471-2148-9-234-S2.pdf]

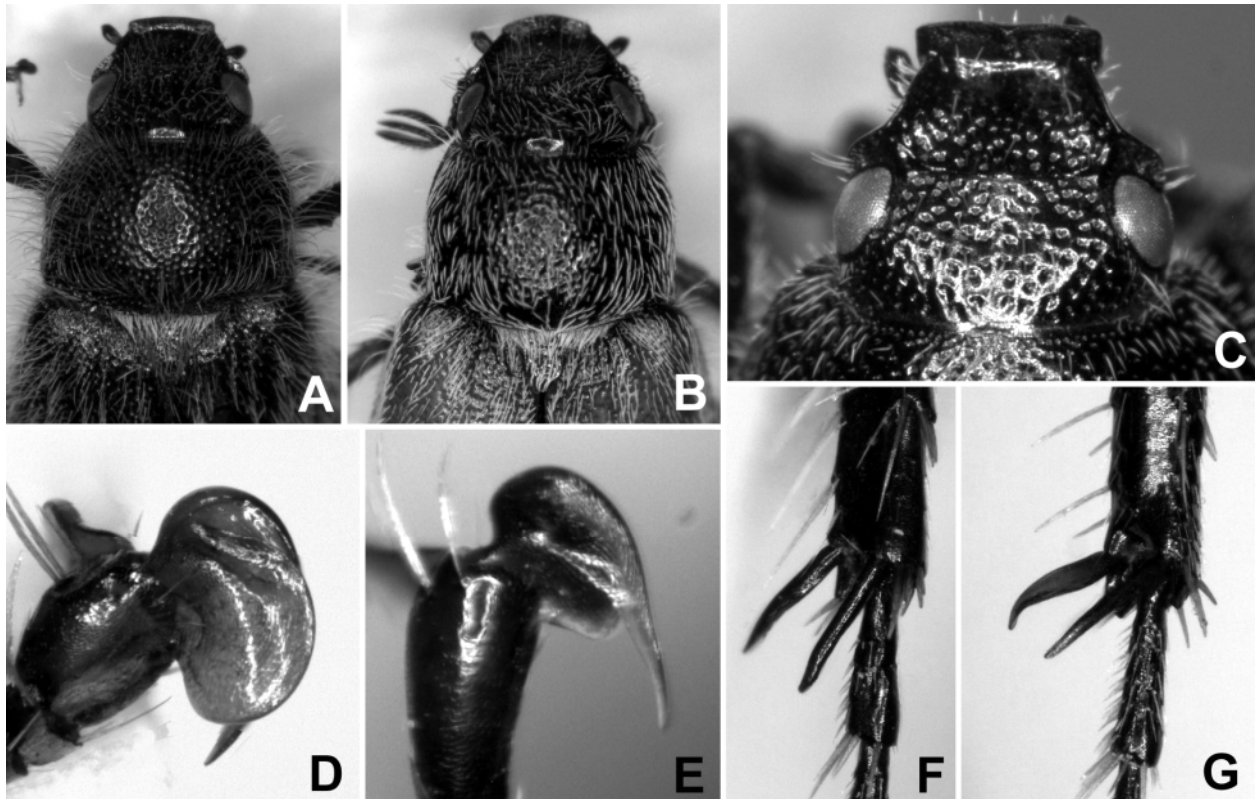

**Additional file 2.** Illustration of features representing the structural morphology character system: anterior body portion (head and pronotum) showing cuticular integument including pilosity, surface structure and punctation (A, B); head (C), interior lobe of protarsal claws (D, E), ventroapical spur of metatibia (F, G). A, E- *Hymenoplia escaleraei*; B- *H. fulvipennis*; C- *H. clypealis*; D, G- *H. lineolata*; F- *H. arragonica* (not to scale).
