# Supplementary material for: Inferring speciation modes in a clade of Iberian chafers from rates of morphological evolution in different character systems
Source: PubMed Central journal article supplement (PMC2753572; doi:10.1186/1471-2148-9-234), 2009-09-15
Supplement: 1471-2148-9-234-S4.pdf [file 1471-2148-9-234-S4.pdf]

**Additional file 4.** Morphological character matrix.

| Char. number (10)                     | 1          | 111111111 |
|---------------------------------------|------------|-----------|
| Char. number                          | 1234567890 | 123456789 |
| <i>Paratriodonta romana</i> -BM670857 | 00?0001020 | 020000100 |
| <i>Hymenoplia. arragonica</i> -DA0154 | 0110100122 | 011100001 |
| <i>H. arragonica</i> -DA0156          | 1110100122 | 011100001 |
| <i>H. arragonica</i> -DA0158          | 1110100122 | 011100001 |
| <i>H. arragonica</i> -DA0159          | 1110100122 | 011100001 |
| <i>H. clypealis</i> -DA0163           | 1110000121 | 110101201 |
| <i>H. clypealis</i> -DA0164           | 1110000121 | 110101201 |
| <i>H. clypealis</i> -DA0200           | 1110000121 | 110101201 |
| <i>H. clypealis</i> -DA0201           | 1110000121 | 110101201 |
| <i>H. escalerai</i> -DA0017           | 0110100122 | 110100001 |
| <i>H. escalerai</i> -DA0018           | 0110100122 | 110100001 |
| <i>H. escalerai</i> -DA0019           | 0110100122 | 110100001 |
| <i>H. escalerai</i> -DA0021           | 0110100122 | 110100001 |
| <i>H. fulvipennis</i> -DA0115         | 0111010111 | 110101101 |
| <i>H. fulvipennis</i> -DA0116         | 0111010111 | 110101101 |
| <i>H. fulvipennis</i> -DA0117         | 0111010111 | 110101101 |
| <i>H. fulvipennis</i> -DA0198         | 0111010131 | 110101101 |
| <i>H. fulvipennis</i> -DA0214         | 0111010131 | 110101101 |
| <i>H. fulvipennis</i> -DA0215         | 0111010111 | 110101101 |
| <i>H. galaica</i> -DA0145             | 1110000122 | 110101201 |
| <i>H. galaica</i> -DA0146             | 1110000122 | 110101201 |
| <i>H. lineolata</i> -DA0090           | 0010000121 | 010111210 |
| <i>H. lineolata</i> -DA0091           | 0010000131 | 010101110 |
| <i>H. lineolata</i> -DA0094           | 0010??0120 | 01010???0 |
| <i>H. lineolata</i> -DA0092           | 0010000121 | 010111210 |
| <i>H. lineolata</i> -DA0093           | 0010000121 | 010111210 |
| <i>H. lineolata</i> -DA0095           | 0010000121 | 010111210 |
| <i>H. lineolata</i> -DA0096           | 0010000121 | 010111210 |
| <i>H. lineolata</i> -DA0114           | 0010000121 | 010111210 |
| <i>H. lineolata</i> -DA0119           | 0010000121 | 010111210 |
| <i>H. lineolata</i> -DA0186           | 0010000121 | 010111210 |
| <i>H. lineolata</i> -DA0187           | 0010000121 | 010111210 |
| <i>H. lineolata</i> -BM747067         | 0010000121 | 010101210 |
| <i>H. pseudocinerascens</i> -DA0149   | 0110000022 | 110101101 |
| <i>H. pseudocinerascens</i> -DA0150   | 0110000022 | 110101101 |
| <i>H. pseudocinerascens</i> -DA0151   | 0110000022 | 110101101 |
| <i>H. rugulosa</i> -DA0140            | 1110100121 | 110101201 |
| <i>H. rugulosa</i> -DA0141            | 1110100121 | 110101201 |
| <i>H. rugulosa</i> -DA0142            | 1110100121 | 110101201 |
