# Supplementary material for: Inferring speciation modes in a clade of Iberian chafers from rates of morphological evolution in different character systems
Source: PubMed Central journal article supplement (PMC2753572; doi:10.1186/1471-2148-9-234), 2009-09-15
Supplement: 1471-2148-9-234-S6.pdf [file 1471-2148-9-234-S6.pdf]

**Additional file 6.** Morphological measurements of body distances, with the raw data in millimetres (LB- maximum total body length, PW- maximum pronotal width, EW - maximum elytral width, EL -maximum elytral length).

| <b>Specimen</b>                       | <b>LB</b> | <b>PW</b> | <b>EW</b> | <b>EL</b> |
|---------------------------------------|-----------|-----------|-----------|-----------|
| <i>Hymenoplia arragonica</i> -DA0154  | 6.67      | 2.75      | 2.92      | 4.67      |
| <i>H. arragonica</i> -DA0156          | 6.17      | 2.45      | 2.75      | 4.17      |
| <i>H. arragonica</i> -DA0158          | 6.33      | 2.42      | 2.67      | 4.17      |
| <i>H. arragonica</i> -DA0159          | 6.00      | 2.33      | 2.67      | 4.17      |
| <i>H. clypealis</i> -DA0163           | 6.67      | 2.67      | 2.92      | 4.83      |
| <i>H. clypealis</i> -DA0164           | 5.83      | 2.33      | 2.50      | 4.08      |
| <i>H. clypealis</i> -DA0200           | 7.00      | 2.50      | 2.67      | 4.50      |
| <i>H. clypealis</i> -DA0201           | 7.00      | 2.50      | 2.75      | 4.50      |
| <i>H. escaleraei</i> -DA0017          | 6.50      | 2.42      | 2.67      | 4.00      |
| <i>H. escaleraei</i> -DA0018          | 5.58      | 2.42      | 2.67      | 3.83      |
| <i>H. escaleraei</i> -DA0019          | 6.33      | 2.33      | 2.50      | 3.92      |
| <i>H. escaleraei</i> -DA0021          | 6.00      | 2.33      | 2.67      | 3.83      |
| <i>H. fulvipennis</i> -DA0115         | 5.33      | 1.75      | 2.08      | 3.42      |
| <i>H. fulvipennis</i> -DA0116         | 5.00      | 1.75      | 2.00      | 3.17      |
| <i>H. fulvipennis</i> -DA0117         | 5.67      | 1.83      | 2.08      | 3.33      |
| <i>H. fulvipennis</i> -DA0198         | 6.00      | 2.00      | 2.42      | 3.92      |
| <i>H. fulvipennis</i> -DA0214         | 5.25      | 1.88      | 2.17      | 3.42      |
| <i>H. fulvipennis</i> -DA0215         | 5.17      | 1.83      | 2.17      | 3.08      |
| <i>H. galaica</i> -DA0145             | 5.58      | 2.08      | 2.33      | 3.67      |
| <i>H. galaica</i> -DA0146             | 5.67      | 2.17      | 2.33      | 3.83      |
| <i>H. lineolata</i> -DA0090           | 6.33      | 2.50      | 2.58      | 4.33      |
| <i>H. lineolata</i> -DA0091           | 6.00      | 2.42      | 2.50      | 4.00      |
| <i>H. lineolata</i> -DA0092           | 5.50      | 2.22      | 2.33      | 3.58      |
| <i>H. lineolata</i> -DA0093           | 6.17      | 2.42      | 2.50      | 4.08      |
| <i>H. lineolata</i> -DA0094           | 6.83      | 2.83      | 3.00      | 4.75      |
| <i>H. lineolata</i> -DA0095           | 6.33      | 2.75      | 2.83      | 4.55      |
| <i>H. lineolata</i> -DA0096           | 6.75      | 3.08      | 3.08      | 4.83      |
| <i>H. lineolata</i> -DA0114           | 6.08      | 2.33      | 2.50      | 4.00      |
| <i>H. lineolata</i> -DA0119           | 6.33      | 2.28      | 2.33      | 3.83      |
| <i>H. lineolata</i> -DA0186           | 6.67      | 2.50      | 2.67      | 4.33      |
| <i>H. lineolata</i> -DA0187           | 6.00      | 2.42      | 2.50      | 4.00      |
| <i>H. lineolata</i> -BM747067         | 6.67      | 2.50      | 2.67      | 4.33      |
| <i>H. pseudocinerascens</i> -DA0149   | 5.67      | 2.17      | 2.33      | 3.50      |
| <i>H. pseudocinerascens</i> -DA0150   | 5.83      | 2.42      | 2.50      | 3.92      |
| <i>H. pseudocinerascens</i> -DA0151   | 5.83      | 2.33      | 2.50      | 3.75      |
| <i>H. rugulosa</i> -DA0140            | 7.25      | 2.67      | 2.92      | 4.75      |
| <i>H. rugulosa</i> -DA0141            | 7.08      | 2.67      | 2.92      | 4.83      |
| <i>H. rugulosa</i> -DA0142            | 6.92      | 2.83      | 3.00      | 4.75      |
| <i>Paratriodonta romana</i> -BM670857 | 6.30      | 2.47      | 2.65      | 4.20      |
