# Supplementary material for: Inferring speciation modes in a clade of Iberian chafers from rates of morphological evolution in different character systems
Source: PubMed Central journal article supplement (PMC2753572; doi:10.1186/1471-2148-9-234), 2009-09-15
Supplement: 1471-2148-9-234-S9.pdf [file 1471-2148-9-234-S9.pdf]

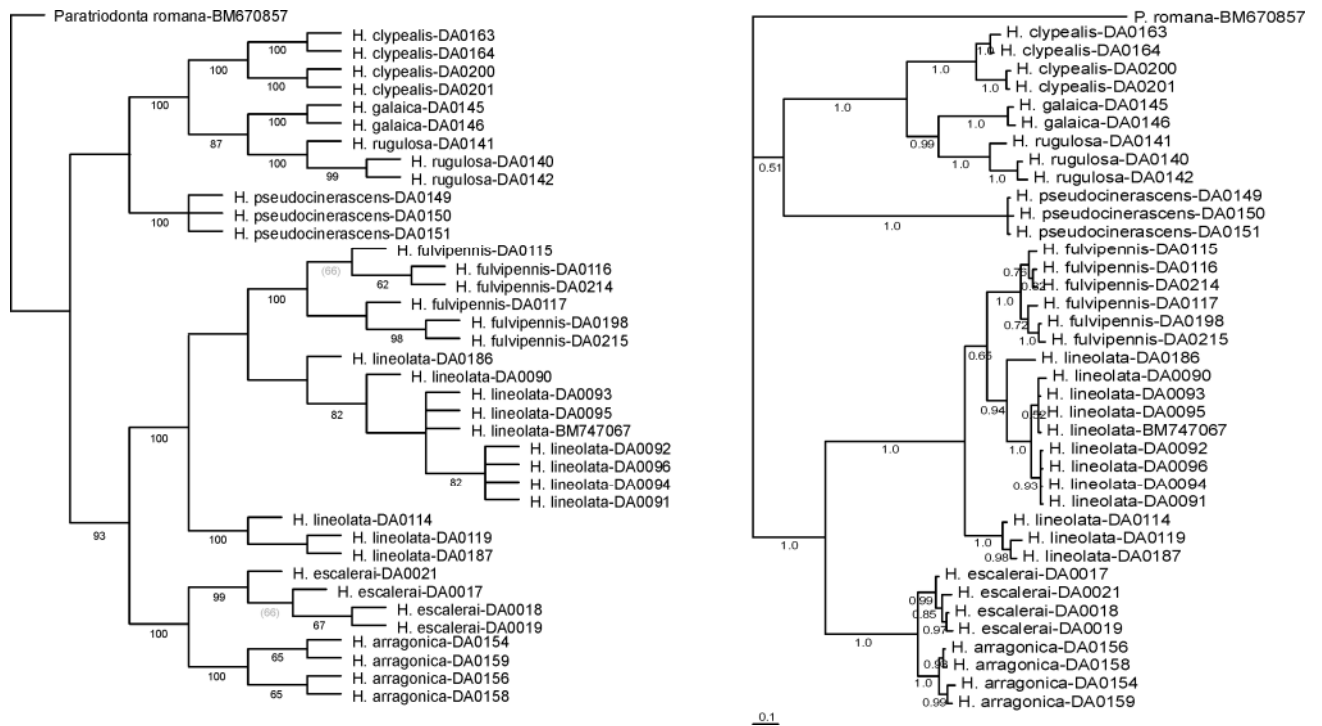

**Additional file 9.** Parsimony (50% majority rule consensus) and consensus phylogram obtained with MrBayes (bootstrap values above 50% and Posterior probability are shown below branches).
