# Supplementary material for: Inferring speciation modes in a clade of Iberian chafers from rates of morphological evolution in different character systems
Source: PubMed Central journal article supplement (PMC2753572; doi:10.1186/1471-2148-9-234), 2009-09-15
Supplement: 1471-2148-9-234-S10.pdf [file 1471-2148-9-234-S10.pdf]

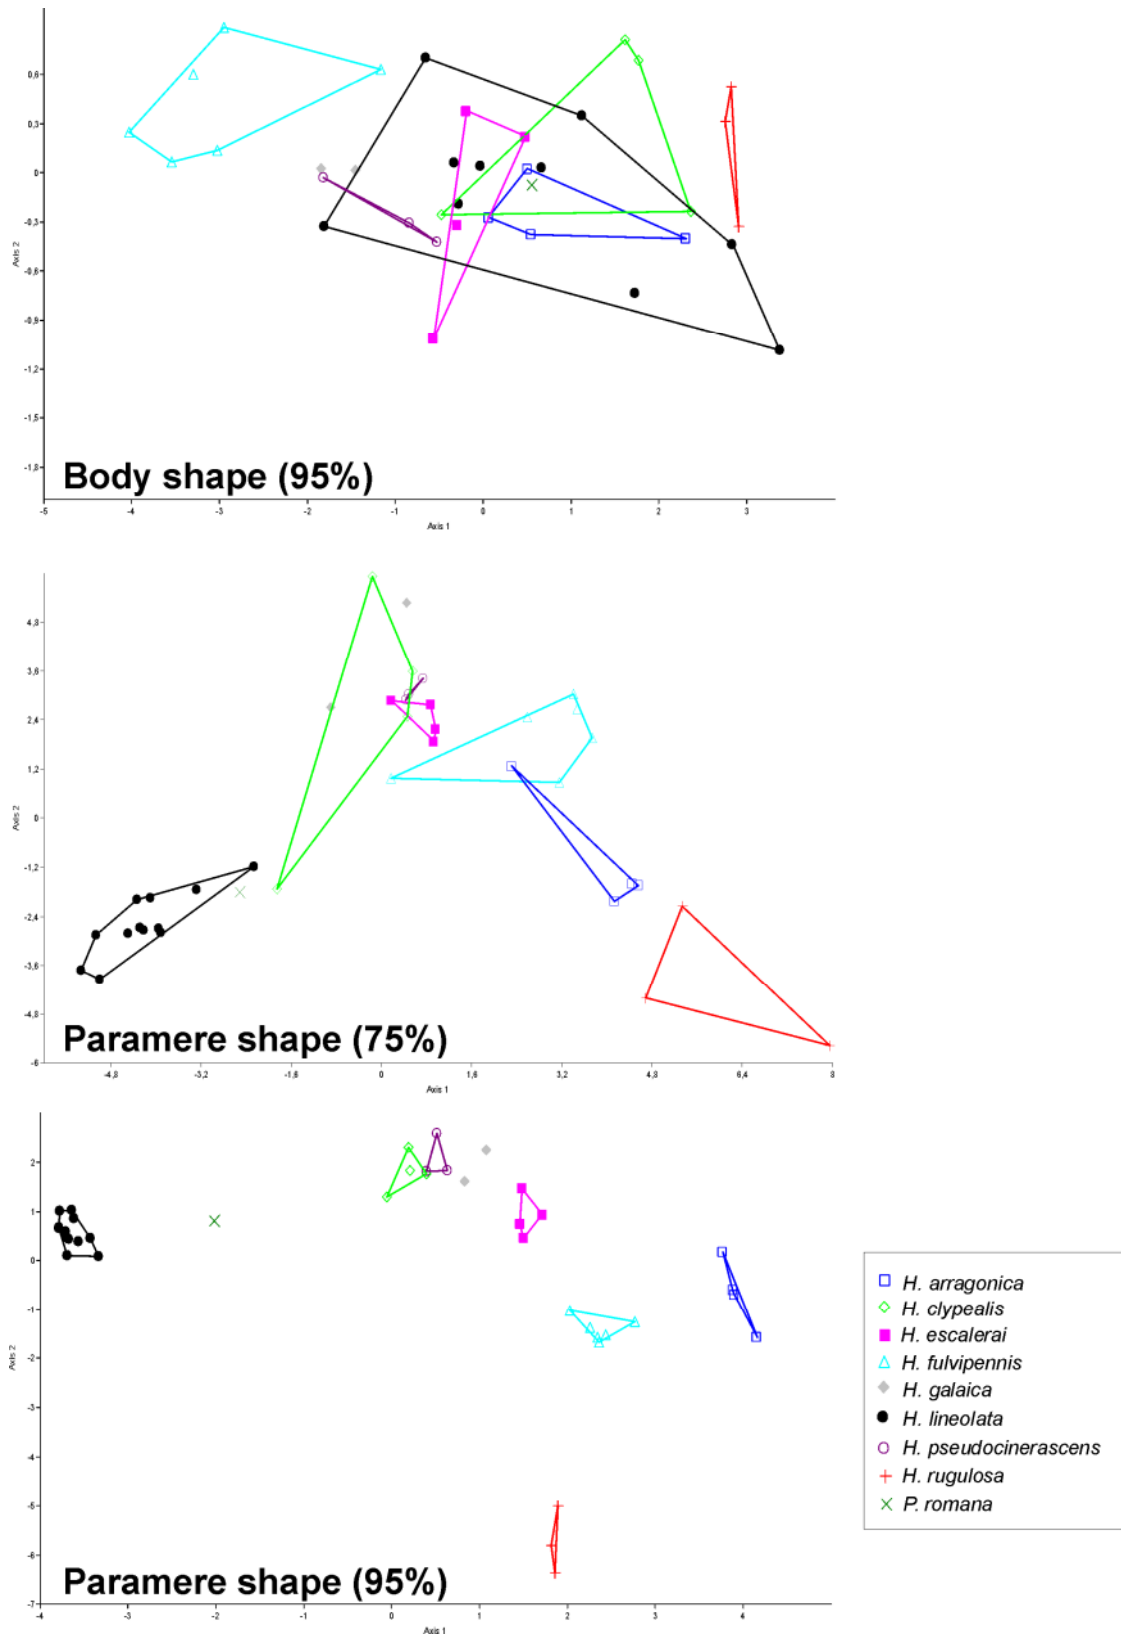

**Additional file 10.** Plots of Canonical Variate Analysis showing the species-specific divergence in the quantitative morphological traits (body shape and paramere shape; the latter specified for 95%(PC axis 1-22) and 75% (PC axis 1-10) of the variation).
